# Supplementary material for: Photomodulated molecular recognition of the guanidinium cationElectronic supplementary information (ESI) available: UV/visible absorption spectra of 1, showing changes observed on irradiation at 345 nm and thermal recovery of the original spectrum. See http://www.rsc.org/suppdata/cc/b3/b311060e/
Source: Royal Society of Chemistry journal article supplement (doi:10.1039/b311060e), 2003-12-19
Supplement: b311060e.doc [file b311060e.doc]

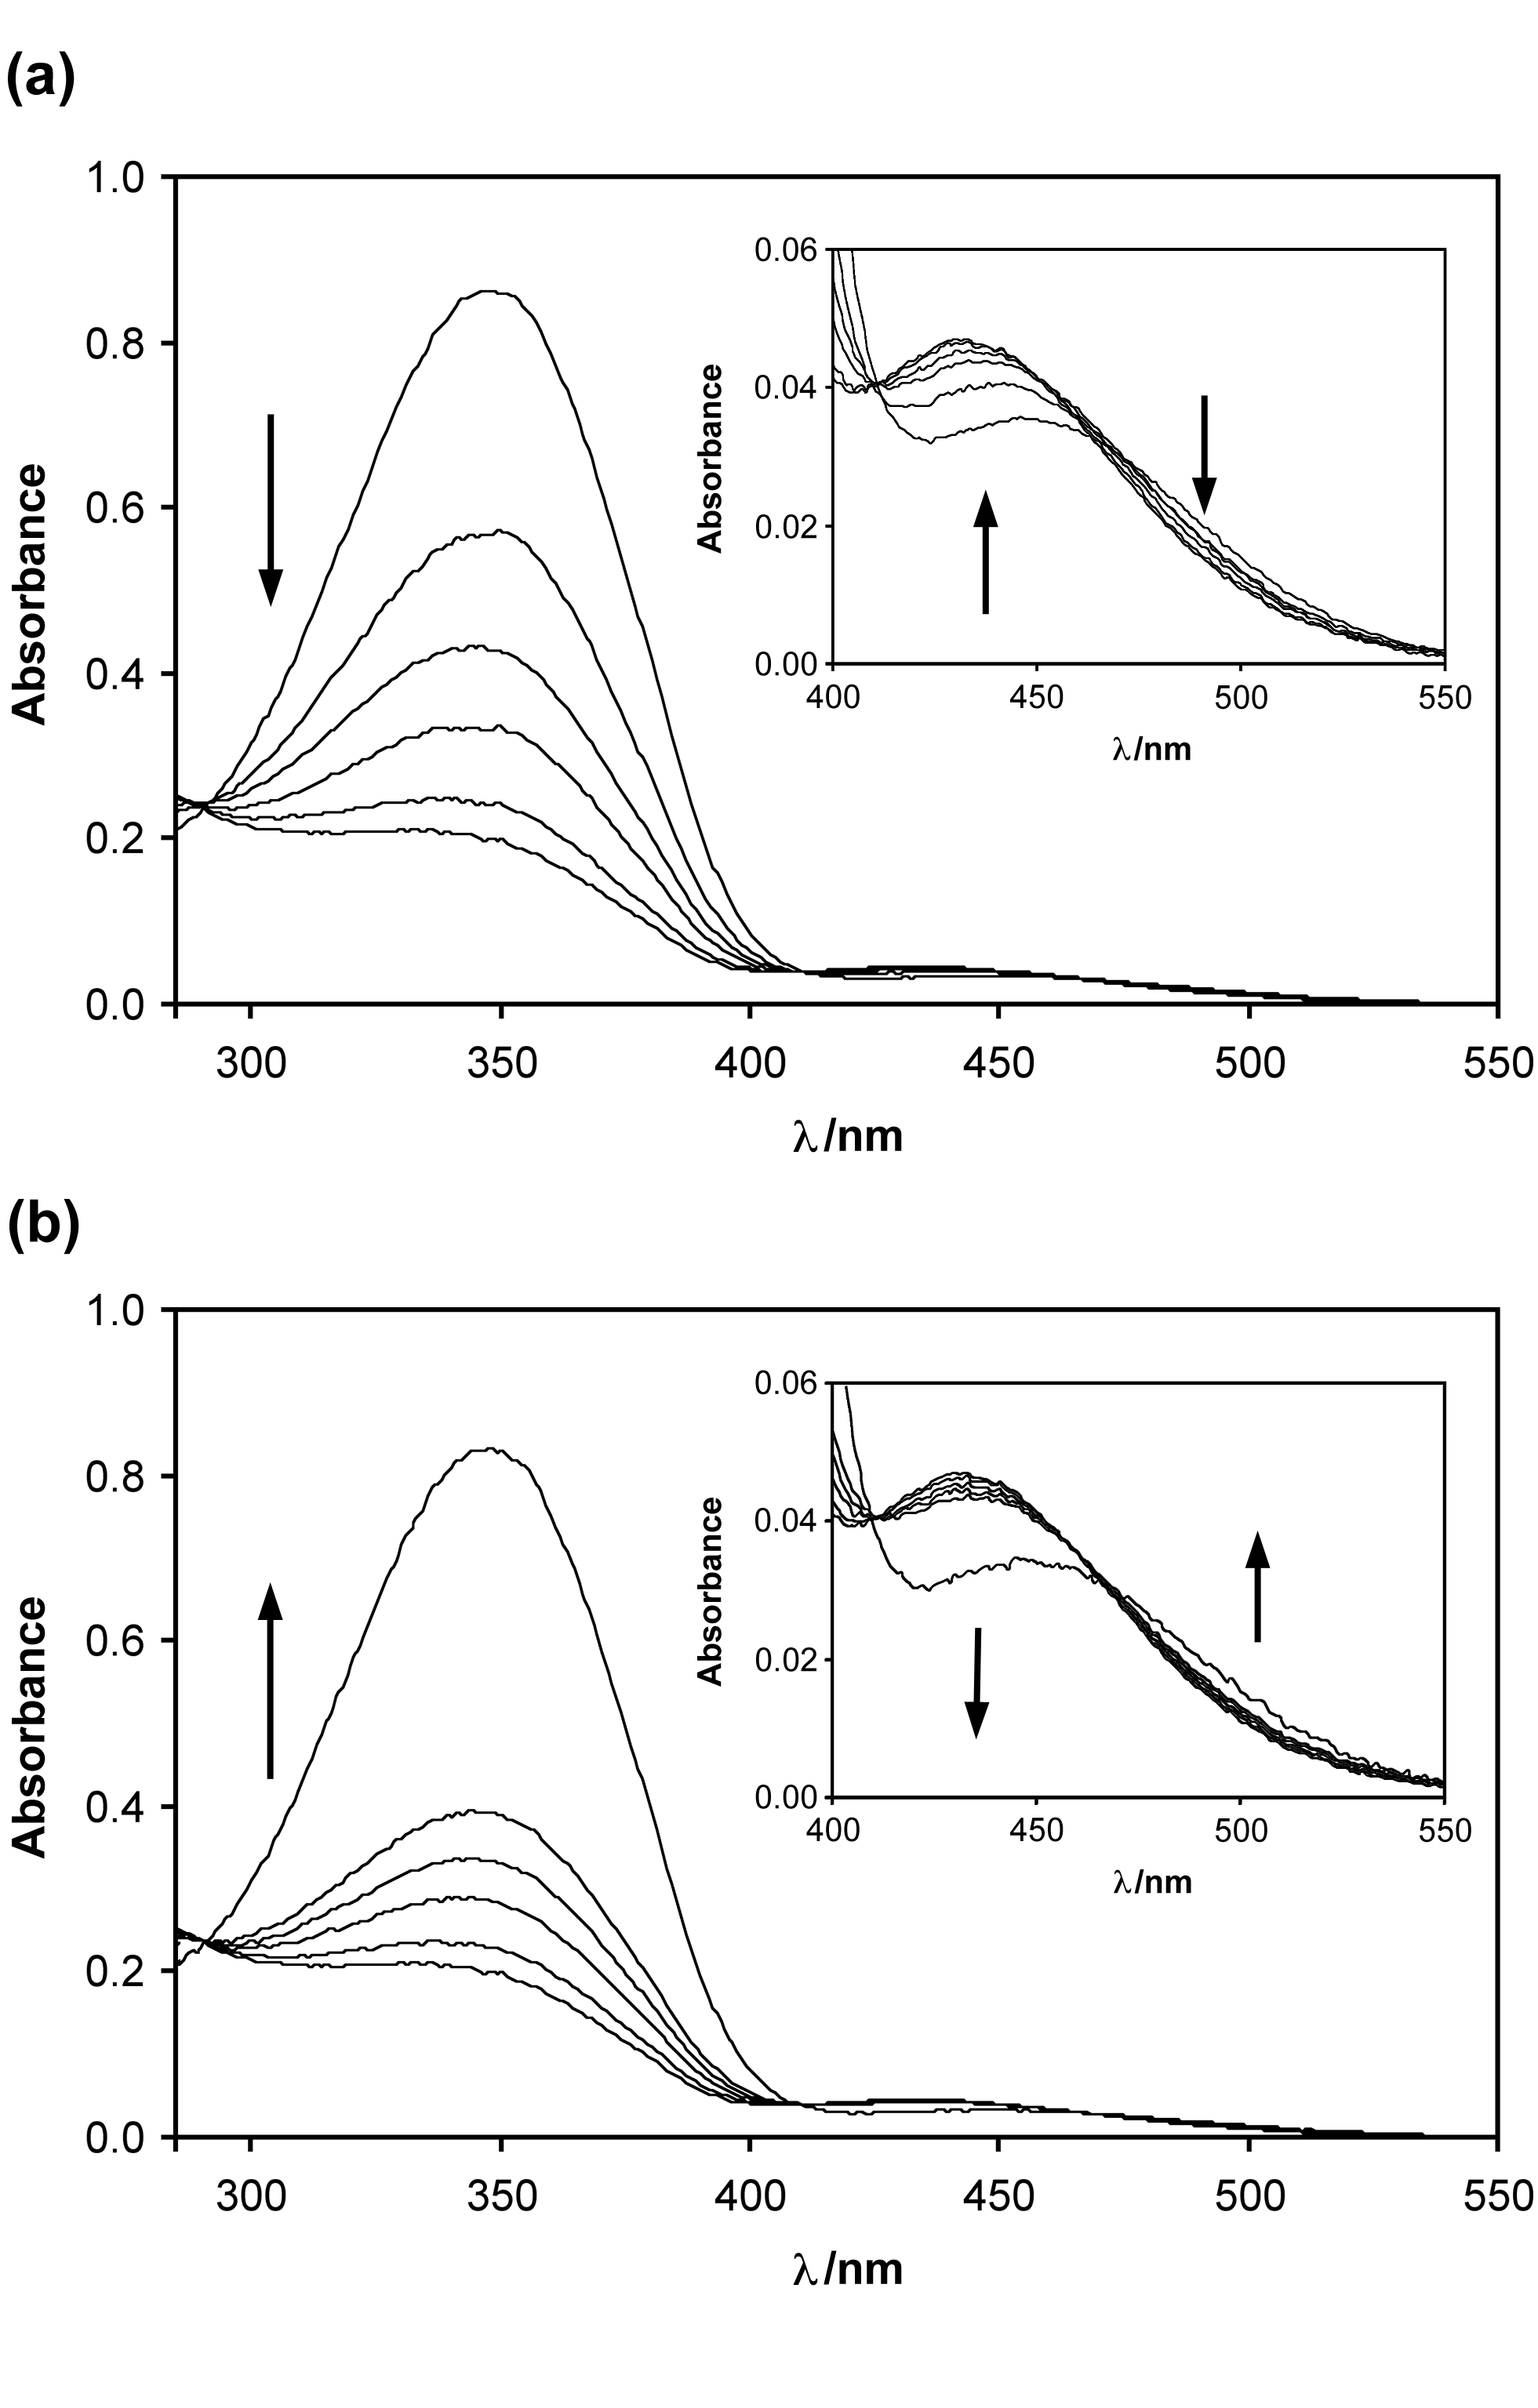


(a). UV/visible spectra of **1** upon irradiation at 345 nm. Times of irradiation are t = 0, 30, 60, 120, 160 and 220 min, when the photostationary state is reached and no further change is observed.

(b) UV/visible spectra of the same sample when left in the dark at room temperature. Times are t = 0, 40, 100, 160, 245 and 2000 minutes, when the original spectrum fully recovered.
